# Supplementary material for: Characterization of Two Pseudomonas aeruginosa Viruses vB_PaeM_SCUT-S1 and vB_PaeM_SCUT-S2
Source: PubMed Central journal article supplement (PMC6521218; doi:10.3390/v11040318), 2019-04-01
Supplement: viruses-11-00318-s001.pdf [file viruses-11-00318-s001.pdf]

## Supporting information

# Characterization of two *Pseudomonas aeruginosa* viruses vB\_PaeM\_SCUT-S1 and vB\_PaeM\_SCUT-S2

Yangyijun Guo<sup>1</sup>, Ping Chen<sup>1</sup>, Zhanglin Lin<sup>1,\*</sup> and Tingting Wang<sup>1,\*</sup>

<sup>1</sup> School of Biology and Biological Engineering, South China University of Technology, 382 East Outer Loop Road, Higher Education Mega Centre, Guangzhou, Guangdong 510006, China;

\* Correspondence: zhanglinlin@scut.edu.cn (Z.L); wangtt@scut.edu.cn (T.W.); Tel.: +86-20-3839-0639, (T.W.)

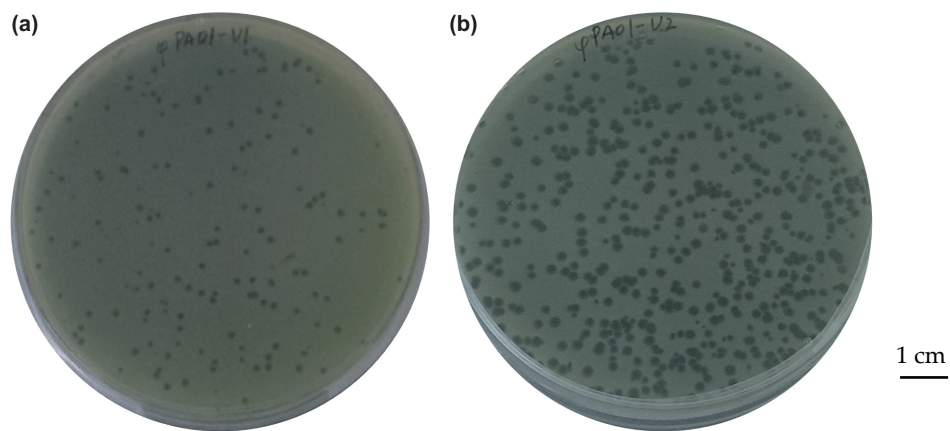

**Figure S1.** Plaques formed by phage vB\_PaeM\_SCUT-S1 (a) and vB\_PaeM\_SCUT-S2 (b) infecting *P. aeruginosa* PAO1.

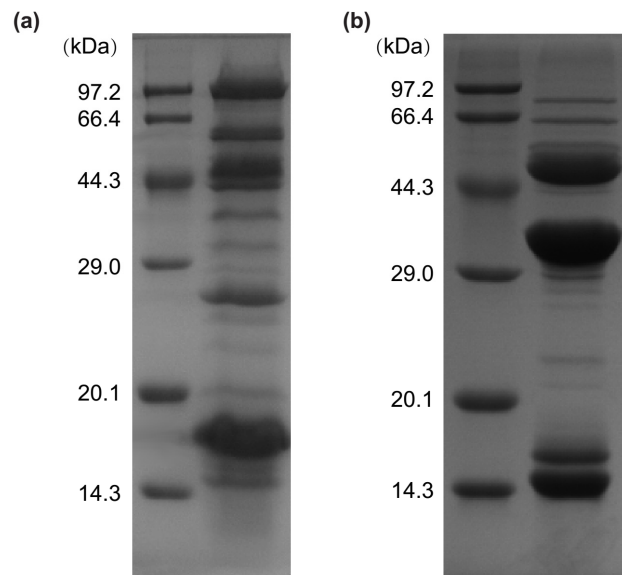

**Figure S2.** Identification of the structural proteins. (a) SDS-PAGE analysis of phage vB\_PaeM\_SCUT-S1; (b) SDS-PAGE analysis of phage vB\_PaeM\_SCUT-S2.

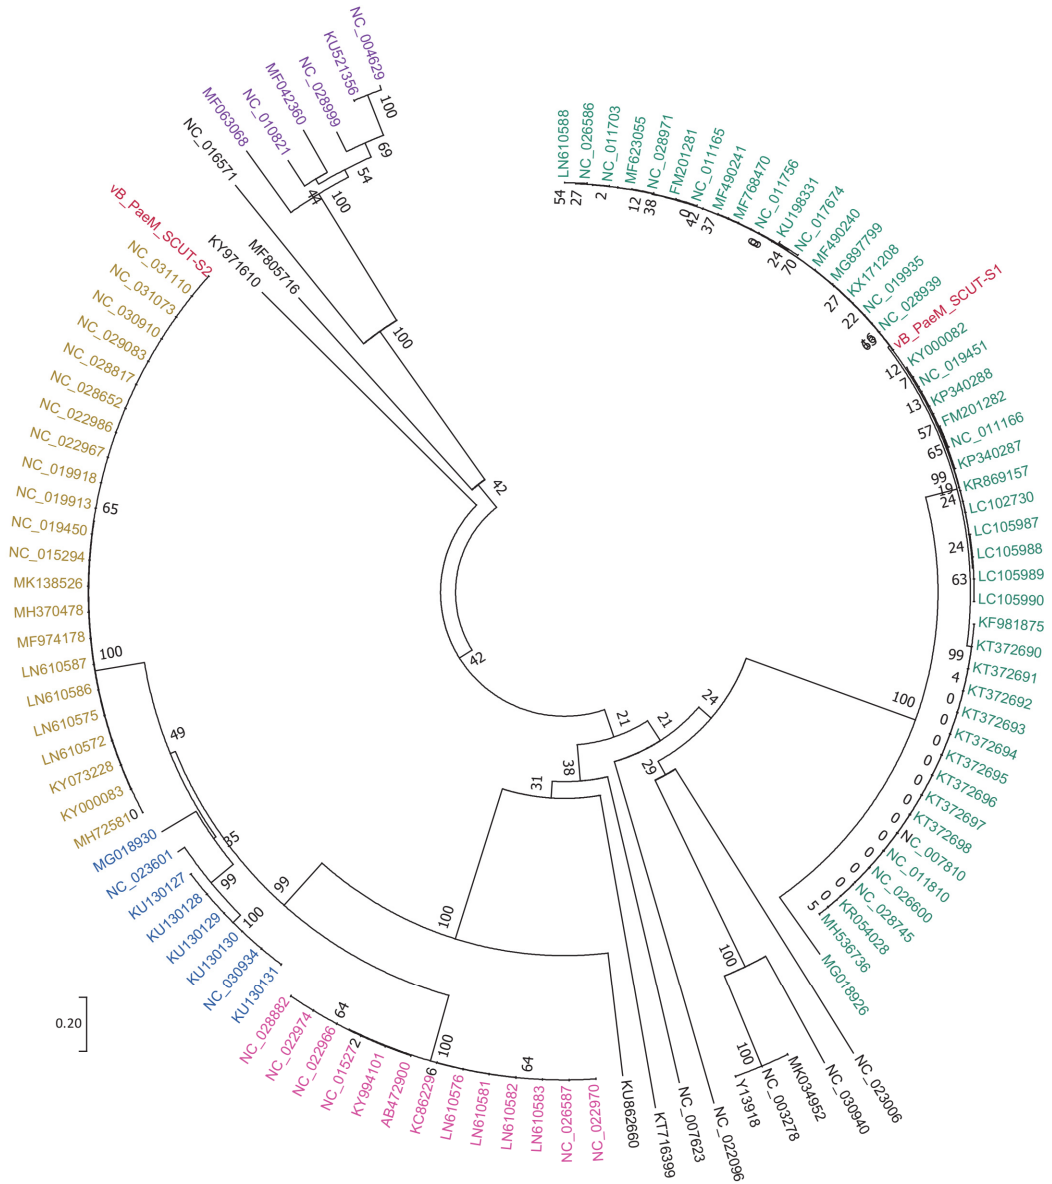

**Figure S3.** Neighbor-joining tree showing the phylogenetic relationships among Pseudomonas phages of Myoviridae family. The tree was constructed based on the amino acid sequence of the large terminase subunit, the value at the nodes indicated the bootstrap support scores calculated by MEGA 7 using 1000 replicates. The accession number of the complete phage genome were shown.

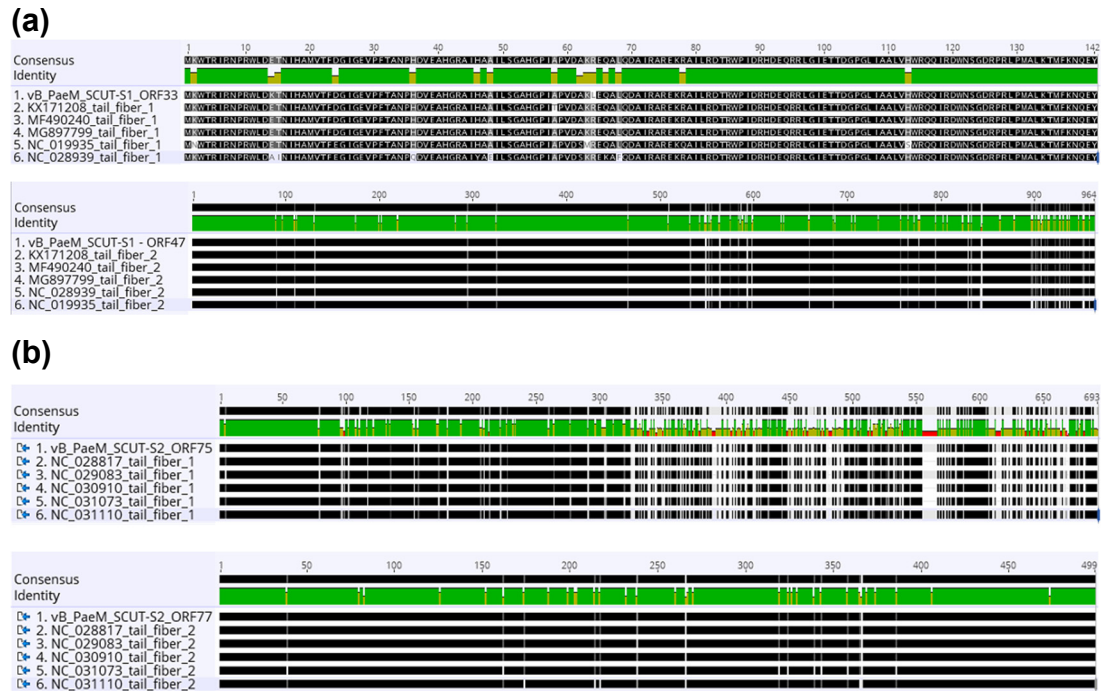

**Figure S4.** The comparison of the tail fiber proteins of phage vB\_PaeM\_SCUT-S1 (a) and vB\_PaeM\_SCUT-S2 (b) to the five most closely related phages.

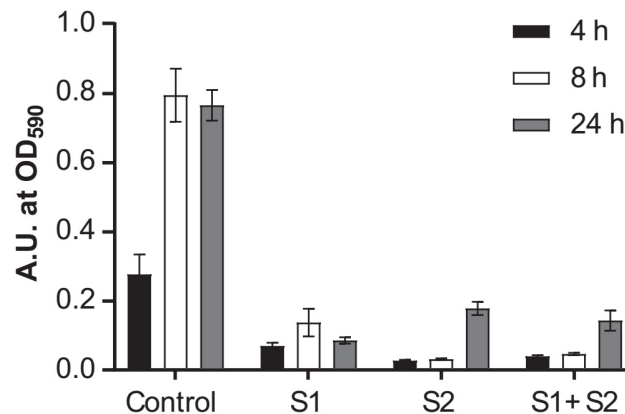

**Figure S5.** The inhibitory effect of phage treatment on biofilm formation based on the biomass tested by CV staining; Control, without any phages; S1, treated with  $10^8$  pfu of phage vB\_PaeM\_SCUT-S1; S2, treated with  $10^8$  pfu phage vB\_PaeM\_SCUT-S2; S1+S2, treated with a mixture of vB\_PaeM\_SCUT-S1 and vB\_PaeM\_SCUT-S2 ( $0.5 \times 10^8$  pfu of each phage). The different treatment duration is indicated by different bar colors.

**Table S1.** Host range of phage vB\_PaeM\_SCUT-S1 and vB\_PaeM\_SCUT-S2.

| Species                                  | Strains    | vB_PaeM_S<br>CUT-S1 | vB_PaeM_S<br>CUT-S2 |
|------------------------------------------|------------|---------------------|---------------------|
| <i>Pseudomonas<br/>aeruginosa</i>        | ATCC 9027  | -                   | T C                 |
|                                          | ATCC 15442 | C++                 | +++ C               |
|                                          | ATCC 27853 | C+                  | ++ C+               |
|                                          | PAO1       | C+++                | ++ C+               |
|                                          | PALWL1.001 | C+++                | ++ C+               |
|                                          | PALWL1.002 | C+++                | ++ C+               |
|                                          | PALWL1.003 | C++                 | +                   |
| <i>Stenotrophomona<br/>s maltophilia</i> | ATCC 51331 | -                   | -                   |

“C+++”, a large lysis zone at  $10^2$  pfu; “C++”, individual plaques at  $10^2$  - $10^3$  pfu; “C+”, individual plaques at  $10^4$  - $10^5$  pfu; T, turbid lysis zone at  $10^6$  - $10^7$  pfu; -, no lysis.

**Table S2.** The genome annotation of *Pseudomonas* phage vB\_PaeM\_SCUT-S1

| Gene | Start | Stop  | Strand | Product length (AA) | Putative function                                 | Query cover(%) | Identity (%) | E-value   | Source             | GenBank accession No. |
|------|-------|-------|--------|---------------------|---------------------------------------------------|----------------|--------------|-----------|--------------------|-----------------------|
| 1    | 303   | 1     | -      | 100                 | hypothetical protein                              | 98.00          | 100.00       | 3.55E-66  | phage JG024        | YP_006200766.1        |
| 2    | 461   | 315   | -      | 48                  | hypothetical protein                              | 100.00         | 100.00       | 6.96E-27  | phage NH-4         | YP_007002548.1        |
| 3    | 832   | 659   | -      | 57                  | hypothetical protein                              | 100.00         | 93.00        | 1.75E-33  | vB_PaeM_PAO1_A     | YP_009124324.1        |
| 4    | 1165  | 878   | -      | 95                  | hypothetical protein                              | 100.00         | 100.00       | 3.75E-41  | b27<br>phage NH-4  | YP_007002549.1        |
| 5    | 1240  | 2622  | +      | 460                 | putative terminase, large subunit                 | 99.78          | 100.00       | 0         | phage KPP12        | YP_007238156.1        |
| 6    | 3042  | 2659  | -      | 127                 | hypothetical protein                              | 99.21          | 100.00       | 3.12E-88  | phage KPP12        | YP_007238158.1        |
| 7    | 3257  | 3039  | -      | 72                  | hypothetical protein                              | 100.00         | 100.00       | 6.41E-49  | phage NH-4         | YP_007002552.1        |
| 8    | 3589  | 3257  | -      | 110                 | hypothetical protein                              | 100.00         | 100.00       | 4.79E-79  | phage NH-4         | YP_007002553.1        |
| 9    | 4031  | 3633  | -      | 132                 | hypothetical protein                              | 99.24          | 100.00       | 1.81E-91  | phage NH-4         | YP_007002554.1        |
| 10   | 4813  | 4034  | -      | 259                 | hypothetical protein                              | 98.84          | 100.00       | 0         | phage LBL3         | YP_002154152.1        |
| 11   | 5337  | 4900  | -      | 145                 | hypothetical protein                              | 86.21          | 100.00       | 5.28E-89  | phage DL60         | YP_009193732.1        |
| 12   | 5942  | 5355  | -      | 195                 | hypothetical protein                              | 100.00         | 100.00       | 9.54E-148 | phage JG024        | YP_006200776.1        |
| 13   | 6047  | 5952  | -      | 31                  | hypothetical protein                              | 96.77          | 100.00       | 2.76E-15  | phage KPP12        | YP_007238165.1        |
| 14   | 6976  | 6044  | -      | 310                 | hypothetical protein                              | 99.36          | 100.00       | 0         | phage NH-4         | YP_007002559.1        |
| 15   | 7427  | 7080  | -      | 115                 | hypothetical protein                              | 98.26          | 100.00       | 1.39E-78  | phage LBL3         | YP_002154156.1        |
| 16   | 7987  | 7676  | -      | 103                 | hypothetical protein                              | 100.00         | 100.00       | 9.39E-71  | vB_PaeM_PAO1_A     | YP_009124336.1        |
| 17   | 8196  | 7993  | -      | 67                  | hypothetical protein                              | 97.02          | 100.00       | 5.6E-42   | b27<br>phage PB1   | YP_002455945.1        |
| 18   | 8516  | 8193  | -      | 107                 | hypothetical protein                              | 100.00         | 100.00       | 8.97E-78  | phage PB1          | YP_002455946.1        |
| 19   | 8949  | 8548  | -      | 133                 | hypothetical protein                              | 98.50          | 100.00       | 2.78E-93  | phage F8           | YP_001294433.1        |
| 20   | 9129  | 11426 | +      | 765                 | putative minor head protein                       | 99.87          | 100.00       | 0         | phage F8           | YP_001294434.1        |
| 21   | 11426 | 12262 | +      | 278                 | putative minor head protein                       | 99.64          | 100.00       | 0         | phage F8           | YP_001294435.1        |
| 22   | 12282 | 12488 | +      | 68                  | hypothetical protein                              | 100.00         | 100.00       | 7.26E-44  | phage F8           | YP_001294436.1        |
| 23   | 12485 | 12622 | +      | 45                  | hypothetical protein                              | 100.00         | 100.00       | 3.6E-25   | phage F8           | YP_001294437.1        |
| 24   | 13138 | 14574 | +      | 478                 | putative structural protein                       | 100.00         | 100.00       | 0         | phage F8           | YP_001294438.1        |
| 25   | 14578 | 15213 | +      | 211                 | putative structural protein                       | 99.53          | 100.00       | 9.2E-150  | phage F8           | YP_001294439.1        |
| 26   | 15223 | 16371 | +      | 382                 | putative major structural protein                 | 99.74          | 100.00       | 0         | phage F8           | YP_001294440.1        |
| 27   | 16473 | 16910 | +      | 145                 | hypothetical protein                              | 100.00         | 100.00       | 2.67E-107 | phage F8           | YP_001294441.1        |
| 28   | 16925 | 17392 | +      | 155                 | putative structural protein                       | 98.71          | 100.00       | 8.64E-111 | phage F8           | YP_001294442.1        |
| 29   | 17389 | 17787 | +      | 132                 | putative structural protein                       | 95.46          | 100.00       | 2.49E-90  | phage DL60         | YP_009193804.1        |
| 30   | 17795 | 18346 | +      | 183                 | putative structural protein                       | 97.81          | 100.00       | 1.85E-134 | phage F8           | YP_001294444.1        |
| 31   | 18343 | 18924 | +      | 193                 | hypothetical protein                              | 100.00         | 100.00       | 3.34E-140 | phage NH-4         | YP_007002576.1        |
| 32   | 18941 | 20455 | +      | 504                 | putative structural protein                       | 99.60          | 100.00       | 0         | phage F8           | YP_001294446.1        |
| 33   | 20513 | 20965 | +      | 150                 | putative tail fiber protein                       | 100.00         | 100.00       | 7.79E-106 | phage JG024        | YP_006200796.1        |
| 34   | 20965 | 21288 | +      | 107                 | putative structural protein                       | 100.00         | 100.00       | 4.34E-78  | phage PB1          | YP_002455962.1        |
| 35   | 21285 | 21635 | +      | 116                 | putative structural protein                       | 100.00         | 100.00       | 3.3E-81   | phage LBL3         | YP_002154175.1        |
| 36   | 21637 | 22065 | +      | 142                 | putative structural protein                       | 94.37          | 100.00       | 5.36E-91  | phage DL60         | YP_009193798.1        |
| 37   | 22075 | 22578 | +      | 167                 | putative structural protein                       | 100.00         | 100.00       | 3.78E-118 | phage PB1          | YP_002455965.1        |
| 38   | 22578 | 23117 | +      | 179                 | putative structural protein                       | 100.00         | 100.00       | 8.88E-131 | phage PB1          | YP_002455966.1        |
| 39   | 23126 | 23719 | +      | 197                 | putative tail fiber protein                       | 98.99          | 100.00       | 9.97E-142 | phage F8           | YP_001294453.1        |
| 40   | 23729 | 24157 | +      | 142                 | hypothetical protein                              | 100.00         | 100.00       | 8.36E-104 | phage PB1          | YP_002455968.1        |
| 41   | 24161 | 26743 | +      | 860                 | putative tail protein containing transglycosylase | 99.77          | 100.00       | 0         | phage F8           | YP_001294455.1        |
| 42   | 26743 | 27606 | +      | 287                 | putative structural protein                       | 99.65          | 100.00       | 0         | phage F8           | YP_001294456.1        |
| 43   | 27606 | 28139 | +      | 177                 | hypothetical protein                              | 100.00         | 100.00       | 4.35E-131 | phage LBL3         | YP_002154183.1        |
| 44   | 28195 | 28860 | +      | 221                 | putative baseplate protein                        | 100.00         | 100.00       | 3.32E-164 | phage LBL3         | YP_002154184.1        |
| 45   | 28917 | 30170 | +      | 417                 | putative baseplate protein                        | 99.04          | 100.00       | 0         | phage DL68         | YP_009215185.1        |
| 46   | 30167 | 31681 | +      | 504                 | putative structural protein                       | 99.01          | 100.00       | 0         | phage KPP12        | YP_007238197.1        |
| 47   | 31686 | 34580 | +      | 964                 | putative tail fiber protein                       | 99.07          | 100.00       | 0         | vB_PaeM_PAO1_A     | YP_009124366.1        |
| 48   | 34582 | 35010 | +      | 142                 | putative tail fiber protein                       | 97.89          | 100.00       | 1.51E-100 | b27<br>phage       | YP_009124367.1        |
| 49   | 35010 | 35672 | +      | 220                 | putative endolysin                                | 100.00         | 100.00       | 1.45E-165 | b27<br>phage KPP12 | YP_007238200.1        |
| 50   | 35948 | 35697 | -      | 83                  | hypothetical protein                              | 100.00         | 100.00       | 2.41E-53  | phage JG024        | YP_006200813.1        |
| 51   | 37139 | 36228 | -      | 303                 | putative DNA ligase                               | 99.34          | 100.00       | 0         | phage LMA2         | YP_002154282.1        |
| 52   | 37748 | 37194 | -      | 184                 | putative DNA-binding protein                      | 99.46          | 100.00       | 2.57E-135 | phage NH-4         | YP_007002597.1        |
| 53   | 38350 | 37745 | -      | 201                 | putative holin                                    | 100.00         | 100.00       | 5.33E-142 | phage KPP12        | YP_007238204.1        |
| 54   | 39303 | 38404 | -      | 299                 | hypothetical protein                              | 99.67          | 100.00       | 0         | phage 14-1         | YP_002364360.1        |
| 55   | 40012 | 39392 | -      | 206                 | hypothetical protein                              | 99.52          | 100.00       | 1.86E-147 | phage SN           | YP_002418860.1        |
| 56   | 41666 | 40107 | -      | 519                 | putative DNA helicase                             | 100.00         | 100.00       | 0         | phage KPP12        | YP_007238207.1        |
| 57   | 42073 | 41663 | -      | 136                 | putative DNA helicase                             | 100.00         | 100.00       | 8.77E-98  | phage NH-4         | YP_007002602.1        |
| 58   | 45173 | 42066 | -      | 1035                | putative DNA polymerase III alpha subunit         | 99.81          | 100.00       | 0         | phage KPP12        | YP_007238209.1        |
| 59   | 45727 | 45173 | -      | 184                 | putative DNA polymerase III epsilon subunit       | 100.00         | 100.00       | 2.53E-138 | phage NH-4         | YP_007002604.1        |
| 60   | 46819 | 45803 | -      | 338                 | putative polynucleotide kinase                    | 100.00         | 100.00       | 0         | phage KPP12        | YP_007238211.1        |
| 61   | 47013 | 46822 | -      | 63                  | hypothetical protein                              | 100.00         | 100.00       | 2.83E-39  | phage JG024        | YP_006200824.1        |

|    |       |       |   |     |                                           |        |        |           |                         |                |
|----|-------|-------|---|-----|-------------------------------------------|--------|--------|-----------|-------------------------|----------------|
| 62 | 47932 | 47015 | - | 305 | putative thymidylate synthase             | 100.00 | 100.00 | 0         | phage SN                | YP_002418867.1 |
| 63 | 48138 | 47932 | - | 68  | hypothetical protein                      | 94.12  | 100.00 | 1.67E-41  | phage NH-4              | YP_007002608.1 |
| 64 | 48373 | 48146 | - | 75  | hypothetical protein                      | 100.00 | 100.00 | 2.65E-51  | phage KPP12             | YP_007238215.1 |
| 65 | 48624 | 48406 | - | 72  | putative tail assembly protein            | 100.00 | 100.00 | 2.69E-49  | phage KPP12             | YP_007238216.1 |
| 66 | 48826 | 48608 | - | 72  | hypothetical protein                      | 100.00 | 100.00 | 3.71E-46  | phage KPP12             | YP_007238217.1 |
| 67 | 49056 | 48826 | - | 76  | hypothetical protein                      | 98.68  | 100.00 | 5.3E-52   | phage KPP12             | YP_007238218.1 |
| 68 | 50145 | 49144 | - | 333 | hypothetical protein                      | 99.40  | 100.00 | 0         | phage KPP12             | YP_007238219.1 |
| 69 | 51143 | 50250 | - | 297 | putative structural protein               | 98.65  | 100.00 | 0         | phage F8                | YP_001294483.1 |
| 70 | 52491 | 51304 | - | 395 | putative ATP-dependent exonuclease V      | 100.00 | 100.00 | 0         | phage F8                | YP_001294484.1 |
| 71 | 52900 | 52478 | - | 140 | hypothetical protein                      | 100.00 | 100.00 | 3.22E-101 | phage LMA2              | YP_002154302.1 |
| 72 | 53069 | 53854 | + | 261 | hypothetical protein                      | 98.85  | 100.00 | 0         | phage LMA2              | YP_002154303.1 |
| 73 | 53865 | 54839 | + | 324 | hypothetical protein                      | 61.17  | 100.00 | 1.01E-137 | phage LMA2              | YP_002154304.1 |
| 74 | 54863 | 55321 | + | 152 | hypothetical protein                      | 100.00 | 100.00 | 2.57E-110 | phage LMA2              | YP_002154305.1 |
| 75 | 55318 | 56394 | + | 358 | hypothetical protein                      | 100.00 | 100.00 | 0         | phage KPP12             | YP_007238226.1 |
| 76 | 56400 | 56585 | + | 61  | hypothetical protein                      | 100.00 | 100.00 | 1.2E-36   | phage JG024             | YP_006200840.1 |
| 77 | 56817 | 58472 | + | 551 | putative DNA primase                      | 99.27  | 100.00 | 0         | phage LMA2              | YP_002154308.1 |
| 78 | 58670 | 59299 | + | 209 | hypothetical protein                      | 74.65  | 100.00 | 3.61E-103 | phage KPP12             | YP_007238229.1 |
| 79 | 59479 | 60048 | + | 189 | hypothetical protein                      | 99.47  | 100.00 | 1.32E-140 | phage JG024             | YP_006200844.1 |
| 80 | 60832 | 60218 | - | 204 | hypothetical protein                      | 99.51  | 100.00 | 8.2E-147  | phage LMA2              | YP_002154310.1 |
| 81 | 61740 | 61021 | - | 239 | hypothetical protein                      | 88.24  | 99.00  | 5.01E-134 | vB_PaeM_PAO1_A<br>phage | YP_009124306.1 |
| 82 | 62062 | 61751 | - | 103 | hypothetical protein                      | 97.09  | 100.00 | 5.08E-74  | b27<br>phage SN         | YP_002418886.1 |
| 83 | 62345 | 62115 | - | 76  | hypothetical protein                      | 96.05  | 100.00 | 9.05E-45  | phage PB1               | YP_002456012.1 |
| 84 | 62625 | 62401 | - | 74  | hypothetical protein                      | 98.65  | 100.00 | 7.94E-50  | phage NH-4              | YP_007002630.1 |
| 85 | 63016 | 62690 | - | 108 | hypothetical protein                      | 98.15  | 100.00 | 1.22E-75  | phage NH-4              | YP_007002631.1 |
| 86 | 63661 | 63017 | - | 214 | hypothetical protein                      | 99.07  | 100.00 | 1.79E-157 | phage NH-4<br>phage     | YP_007002632.1 |
| 87 | 63905 | 63693 | - | 70  | hypothetical protein                      | 95.71  | 100.00 | 2.75E-47  | vB_PaeM_PAO1_A<br>b27   | YP_009124313.1 |
| 88 | 64102 | 63902 | - | 66  | hypothetical protein                      | 100.00 | 100.00 | 2.23E-43  | phage NH-4              | YP_007002634.1 |
| 89 | 64314 | 64099 | - | 71  | hypothetical protein                      | 100.00 | 100.00 | 4.63E-47  | phage NH-4              | YP_007002635.1 |
| 90 | 64511 | 64311 | - | 66  | hypothetical protein                      | 98.49  | 100.00 | 7E-43     | phage NH-4              | YP_007002636.1 |
| 91 | 64759 | 64508 | - | 83  | hypothetical protein                      | 98.80  | 100.00 | 5.66E-57  | phage NH-4              | YP_007002637.1 |
| 92 | 65070 | 64885 | - | 61  | hypothetical protein                      | 100.00 | 98.00  | 1.04E-37  | phage LMA2              | YP_002154323.1 |
| 93 | 65343 | 65155 | - | 62  | hypothetical protein                      | 91.94  | 100.00 | 2.95E-39  | phage LMA2              | YP_002154324.1 |
| 94 | 66032 | 65346 | - | 228 | putative tail length tape-measure protein | 86.78  | 99.00  | 0         | phage vB_Pae_PS44       | YP_009211418.1 |

**Table S3.** The genome annotation of *Pseudomonas* phage vB\_PaeM\_SCUT-S2

| Gene | Start | Stop  | Strand | Product length (AA) | Putative function                              | Query cover(%) | Identity (%) | E-value   | Source                  | GenBank accession No. |
|------|-------|-------|--------|---------------------|------------------------------------------------|----------------|--------------|-----------|-------------------------|-----------------------|
| 1    | 55    | 204   | +      | 49                  | hypothetical protein                           | -              | -            | -         | -                       | -                     |
| 2    | 344   | 946   | +      | 200                 | hypothetical protein                           | 99.00          | 100.00       | 5.83E-153 | phage K5                | YP_009273933.1        |
| 3    | 1468  | 1626  | +      | 52                  | hypothetical protein                           | 100.00         | 100.00       | 2.02E-31  | phage JG004             | YP_007002525.1        |
| 4    | 1946  | 1680  | -      | 88                  | hypothetical protein                           | 100.00         | 100.00       | 7.68E-63  | phage PAK P4            | YP_008859337.1        |
| 5    | 2349  | 1939  | -      | 136                 | hypothetical protein                           | 99.27          | 100.00       | 2.19E-99  | phage PAK P4            | YP_008859338.1        |
| 6    | 2755  | 2339  | -      | 138                 | hypothetical protein                           | 99.28          | 100.00       | 8.76E-101 | phage PAK P4            | YP_008859339.1        |
| 7    | 3484  | 2810  | -      | 224                 | hypothetical protein                           | 98.66          | 100.00       | 2.23E-162 | phage PAK P2            | YP_008857170.1        |
| 8    | 3765  | 3487  | -      | 92                  | hypothetical protein                           | 100.00         | 100.00       | 2.09E-60  | phage PAK P4            | YP_008859341.1        |
| 9    | 4064  | 3753  | -      | 103                 | hypothetical protein                           | 100.00         | 100.00       | 1.94E-70  | phage JG004             | YP_007002519.1        |
| 10   | 4426  | 4064  | -      | 120                 | hypothetical protein                           | 100.00         | 100.00       | 6E-87     | phage PAK P4            | YP_008859343.1        |
| 11   | 4698  | 4483  | -      | 71                  | hypothetical protein                           | 100.00         | 100.00       | 3.88E-47  | phage K5                | YP_009273767.1        |
| 12   | 5036  | 4695  | -      | 113                 | hypothetical protein                           | 97.35          | 100.00       | 1.08E-79  | phage PaoP5             | YP_009224704.1        |
| 13   | 5541  | 5038  | -      | 167                 | hypothetical protein                           | 98.20          | 100.00       | 9.6E-123  | phage PaoP5             | YP_009224705.1        |
| 14   | 5905  | 5528  | -      | 125                 | hypothetical protein                           | 100.00         | 100.00       | 1.06E-91  | phage phiMK             | YP_009291226.1        |
| 15   | 6506  | 5925  | -      | 193                 | hypothetical protein                           | 99.48          | 100.00       | 6.42E-143 | phage PAK P1            | YP_004327157.1        |
| 16   | 6820  | 6503  | -      | 105                 | hypothetical protein                           | 98.10          | 100.00       | 3.05E-74  | phage PAK P1            | YP_004327158.1        |
| 17   | 6971  | 6822  | -      | 49                  | hypothetical protein                           | 100.00         | 100.00       | 3.41E-29  | phage vB_PaeM_MAG1      | YP_009287453.1        |
| 18   | 7462  | 6983  | -      | 159                 | hypothetical protein                           | 100.00         | 100.00       | 2.8E-117  | phage K5                | YP_009273774.1        |
| 19   | 7656  | 7459  | -      | 65                  | hypothetical protein                           | 100.00         | 100.00       | 1.49E-44  | phage K5                | YP_009273775.1        |
| 20   | 9356  | 7668  | -      | 562                 | putative nictotinate phosphoribosyltransferase | 99.82          | 100.00       | 0         | phage K5                | YP_009273776.1        |
| 21   | 9631  | 9413  | -      | 72                  | hypothetical protein                           | 100.00         | 100.00       | 9.6E-47   | phage K5                | YP_009273778.1        |
| 22   | 10494 | 9628  | -      | 288                 | phosphoribosylpyrophosphate synthetase         | 100.00         | 100.00       | 0         | phage K5                | YP_009273779.1        |
| 23   | 10920 | 10504 | -      | 138                 | putative ATPase                                | 100.00         | 100.00       | 7.59E-101 | phage K5                | YP_009273780.1        |
| 24   | 11848 | 10931 | -      | 305                 | putative RNA ligase/tail attachment protein    | 100.00         | 100.00       | 0         | phage C11               | YP_009186914.1        |
| 25   | 12267 | 11860 | -      | 135                 | hypothetical protein                           | 100.00         | 100.00       | 2.54E-94  | phage vB_PaeM_C2-10_Ab1 | YP_007236843.1        |
| 26   | 12539 | 12264 | -      | 91                  | putative helix-turn-helix motif                | 100.00         | 100.00       | 1.89E-64  | phage vB_PaeM_C2-10_Ab1 | YP_007236844.1        |
| 27   | 12777 | 12541 | -      | 78                  | hypothetical protein                           | 100.00         | 100.00       | 5.48E-52  | phage JG004             | YP_007002503.1        |
| 28   | 13344 | 12790 | -      | 184                 | putative phosphoesterase                       | 99.46          | 100.00       | 6.8E-137  | phage JG004             | YP_007002502.1        |
| 29   | 13775 | 13344 | -      | 143                 | hypothetical protein                           | 95.11          | 100.00       | 5.1E-99   | phage PaoP5             | YP_009224722.1        |
| 30   | 14319 | 13765 | -      | 184                 | putative phosphohydrolase                      | 93.55          | 100.00       | 2.7E-130  | phage PaoP5             | YP_009224723.1        |
| 31   | 14881 | 14321 | -      | 186                 | putative cell wall hydrolase                   | 100.00         | 100.00       | 5.18E-141 | phage vB_PaeM_C2-10_Ab1 | YP_007236848.1        |
| 32   | 15407 | 14946 | -      | 153                 | hypothetical protein                           | 96.08          | 100.00       | 8.49E-110 | phage vB_PaeM_C2-10_Ab1 | YP_007236850.1        |
| 33   | 16628 | 15420 | -      | 402                 | putative DNA ligase                            | 99.25          | 100.00       | 0         | phage PAK P4            | YP_008859367.1        |
| 34   | 17041 | 16625 | -      | 138                 | putative dCMP deaminase                        | 100.00         | 100.00       | 1.01E-99  | phage JG004             | YP_007002496.1        |
| 35   | 17271 | 17044 | -      | 75                  | hypothetical protein                           | 100.00         | 100.00       | 3.83E-50  | phage PAK P4            | YP_008859369.1        |
| 36   | 17493 | 17281 | -      | 70                  | hypothetical protein                           | 100.00         | 100.00       | 1.67E-45  | phage PAK P4            | YP_008859370.1        |
| 37   | 17759 | 17490 | -      | 89                  | hypothetical protein                           | 100.00         | 100.00       | 2.57E-61  | phage vB_PaeM_C2-10_Ab1 | YP_007236855.1        |
| 38   | 18118 | 17768 | -      | 116                 | hypothetical protein                           | 100.00         | 100.00       | 2.16E-83  | phage vB_PaeM_C2-10_Ab1 | YP_007236856.1        |
| 39   | 18377 | 18099 | -      | 92                  | hypothetical protein                           | 100.00         | 100.00       | 2.46E-63  | phage C11               | YP_009186929.1        |
| 40   | 18652 | 18374 | -      | 92                  | hypothetical protein                           | 100.00         | 100.00       | 1.05E-64  | phage C11               | YP_009186930.1        |
| 41   | 18872 | 18687 | -      | 61                  | hypothetical protein                           | 100.00         | 100.00       | 3.08E-41  | phage C11               | YP_009186931.1        |
| 42   | 19115 | 18873 | -      | 80                  | hypothetical protein                           | 100.00         | 100.00       | 1.04E-54  | phage K5                | YP_009273799.1        |
| 43   | 19297 | 19112 | -      | 61                  | hypothetical protein                           | 98.36          | 100.00       | 8.67E-38  | phage K5                | YP_009273800.1        |
| 44   | 19906 | 19358 | -      | 182                 | putative protease subunit                      | 99.45          | 100.00       | 7.71E-135 | phage vB_PaeM_C2-10_Ab1 | YP_007236861.1        |
| 45   | 20310 | 19954 | -      | 118                 | hypothetical protein                           | 100.00         | 100.00       | 9.21E-81  | phage vB_PaeM_C2-10_Ab1 | YP_007236862.1        |
| 46   | 20774 | 20307 | -      | 155                 | hypothetical protein                           | 100.00         | 100.00       | 2.63E-113 | phage JG004             | YP_007002484.1        |
| 47   | 21249 | 21437 | +      | 62                  | hypothetical protein                           | 100.00         | 100.00       | 3.07E-42  | phage vB_PaeM_C2-10_Ab1 | YP_007236865.1        |
| 48   | 21580 | 21903 | +      | 107                 | hypothetical protein                           | 100.00         | 100.00       | 4.03E-74  | phage PAK P1            | YP_004327192.1        |
| 49   | 22070 | 22264 | +      | 64                  | hypothetical protein                           | 100.00         | 100.00       | 2.44E-41  | phage PAK P1            | YP_004327193.1        |
| 50   | 23341 | 23210 | -      | 43                  | hypothetical protein                           | 100.00         | 100.00       | 2.06E-25  | phage PAK P2            | YP_008857216.1        |
| 51   | 25276 | 26796 | +      | 506                 | putative terminase large subunit               | 100.00         | 100.00       | 0         | phage vB_PaeM_C2-10_Ab1 | YP_007236868.1        |

|    |       |       |   |     |                                         |        |        |           |                                         |                |
|----|-------|-------|---|-----|-----------------------------------------|--------|--------|-----------|-----------------------------------------|----------------|
| 52 | 26809 | 28248 | + | 479 | putative structural protein             | 100.00 | 100.00 | 0         | phage<br>vB_PacM_C2-<br>10_Ab1<br>phage | YP_007236869.1 |
| 53 | 28258 | 28728 | + | 156 | putative methyltransferase              | 100.00 | 100.00 | 7.05E-113 | vB_PacM_C2-<br>10_Ab1<br>phage          | YP_007236870.1 |
| 54 | 28725 | 29642 | + | 305 | hypothetical protein                    | 100.00 | 100.00 | 0         | vB_PacM_C2-<br>10_Ab1<br>phage          | YP_007236871.1 |
| 55 | 29670 | 30080 | + | 136 | putative structural protein             | 99.27  | 100.00 | 6.46E-97  | phage K5<br>phage                       | YP_009273810.1 |
| 56 | 30124 | 31158 | + | 344 | Major capsid protein                    | 100.00 | 100.00 | 0         | vB_PacM_C2-<br>10_Ab1<br>phage          | YP_007236873.1 |
| 57 | 31209 | 31685 | + | 158 | hypothetical protein                    | 100.00 | 100.00 | 5.8E-116  | vB_PacM_C2-<br>10_Ab1<br>phage          | YP_007236874.1 |
| 58 | 31723 | 32136 | + | 137 | putative RNA polymerase                 | 100.00 | 100.00 | 1.51E-101 | phage PAK_P4                            | YP_008859219.1 |
| 59 | 32136 | 32516 | + | 126 | hypothetical protein                    | 100.00 | 100.00 | 8.84E-93  | phage JG004<br>phage                    | YP_007002473.1 |
| 60 | 32513 | 33076 | + | 187 | putative structural protein             | 100.00 | 100.00 | 7.34E-142 | vB_PacM_C2-<br>10_Ab1<br>phage          | YP_007236877.1 |
| 61 | 33089 | 34375 | + | 428 | putative structural protein             | 99.77  | 100.00 | 0         | vB_PacM_MAG1<br>phage                   | YP_009287410.1 |
| 62 | 34406 | 34930 | + | 174 | putative structural protein             | 100.00 | 100.00 | 1.3E-127  | vB_PacM_C2-<br>10_Ab1<br>phage          | YP_007236879.1 |
| 63 | 35005 | 35505 | + | 166 | hypothetical protein                    | 100.00 | 100.00 | 6.14E-122 | vB_PacM_C2-<br>10_Ab1<br>phage          | YP_007236880.1 |
| 64 | 35505 | 35984 | + | 159 | putative structural protein             | 100.00 | 100.00 | 5.25E-116 | vB_PacM_C2-<br>10_Ab1<br>phage          | YP_007236881.1 |
| 65 | 35998 | 36369 | + | 123 | putative structural protein             | 99.19  | 100.00 | 3.52E-87  | vB_PacM_C2-<br>10_Ab1<br>phage          | YP_007236882.1 |
| 66 | 36477 | 36629 | + | 50  | hypothetical protein                    | 100.00 | 100.00 | 1.71E-29  | phage PAK_P4<br>phage                   | YP_008859228.1 |
| 67 | 36626 | 38992 | + | 788 | putative tape measure<br>protein        | 100.00 | 100.00 | 0         | vB_PacM_C2-<br>10_Ab1<br>phage          | YP_007236883.1 |
| 68 | 38989 | 39750 | + | 253 | hypothetical protein                    | 98.81  | 100.00 | 0         | vB_PacM_C2-<br>10_Ab1<br>phage          | YP_007236884.1 |
| 69 | 39756 | 40112 | + | 118 | hypothetical protein                    | 100.00 | 100.00 | 5.03E-85  | vB_PacM_C2-<br>10_Ab1<br>phage          | YP_007236886.1 |
| 70 | 40109 | 41026 | + | 305 | hypothetical protein                    | 100.00 | 100.00 | 0         | phage PAK_P4<br>phage                   | YP_008859232.1 |
| 71 | 41023 | 41763 | + | 246 | putative baseplate protein              | 100.00 | 100.00 | 0         | vB_PacM_C2-<br>10_Ab1<br>phage          | YP_007236888.1 |
| 72 | 41774 | 42145 | + | 123 | hypothetical protein                    | 100.00 | 100.00 | 2.91E-88  | vB_PacM_C2-<br>10_Ab1<br>phage          | YP_007236889.1 |
| 73 | 42147 | 43610 | + | 487 | putative baseplate<br>component         | 100.00 | 100.00 | 0         | vB_PacM_C2-<br>10_Ab1<br>phage          | YP_007236890.1 |
| 74 | 43629 | 44360 | + | 243 | hypothetical protein                    | 100.00 | 100.00 | 3.39E-177 | vB_PacM_C2-<br>10_Ab1<br>phage          | YP_007236891.1 |
| 75 | 44371 | 46428 | + | 685 | putative tail fiber protein             | 97.37  | 99.00  | 0         | phage PaoP5                             | YP_009224767.1 |
| 76 | 46472 | 46846 | + | 124 | putative tail fiber assembly<br>protein | 100.00 | 100.00 | 6.82E-89  | phage phiMK                             | YP_009291165.1 |
| 77 | 46860 | 48359 | + | 499 | putative tail fiber protein             | 99.80  | 100.00 | 0         | phage K5                                | YP_009273832.1 |
| 78 | 48376 | 48936 | + | 186 | putative endolysin                      | 100.00 | 100.00 | 7.06E-140 | phage PaoP5                             | YP_009224770.1 |
| 79 | 48954 | 49193 | + | 79  | hypothetical protein                    | 100.00 | 100.00 | 1.82E-51  | phage PAK_P4                            | YP_008859241.1 |
| 80 | 49180 | 49617 | + | 145 | hypothetical protein                    | 100.00 | 100.00 | 4.73E-106 | phage PaoP5<br>phage                    | YP_009224772.1 |
| 81 | 49755 | 50060 | + | 101 | hypothetical protein                    | 100.00 | 100.00 | 3.15E-68  | vB_PacM_C2-<br>10_Ab1<br>phage          | YP_007236898.1 |
| 82 | 50096 | 50410 | + | 104 | hypothetical protein                    | 100.00 | 100.00 | 1.38E-71  | phage phiMK                             | YP_009291158.1 |
| 83 | 50759 | 50448 | - | 103 | hypothetical protein                    | 100.00 | 100.00 | 2.13E-71  | phage PaoP5                             | YP_009224775.1 |
| 84 | 51091 | 50771 | - | 106 | hypothetical protein                    | 98.11  | 100.00 | 9.49E-75  | phage phiMK<br>phage                    | YP_009291156.1 |
| 85 | 51918 | 51109 | - | 269 | putative pyrophosphatase                | 97.03  | 100.00 | 0         | vB_PacM_C2-<br>10_Ab1<br>phage          | YP_007236901.1 |
| 86 | 52069 | 51911 | - | 52  | hypothetical protein                    | 100.00 | 100.00 | 4.75E-31  | phage C11                               | YP_009186975.1 |
| 87 | 53227 | 52082 | - | 381 | Putative RNA ligase                     | 98.16  | 100.00 | 0         | phage phiMK                             | YP_009291153.1 |
| 88 | 53492 | 53259 | - | 77  | hypothetical protein                    | 100.00 | 100.00 | 1.03E-51  | phage JG004                             | YP_007002443.1 |
| 89 | 53763 | 53530 | - | 77  | hypothetical protein                    | 100.00 | 100.00 | 6.89E-51  | phage JG004<br>phage                    | YP_007002442.1 |
| 90 | 54218 | 54415 | + | 65  | hypothetical protein                    | 100.00 | 100.00 | 1.62E-42  | vB_PacM_C2-<br>10_Ab1<br>phage          | YP_007236905.1 |
| 91 | 54418 | 54903 | + | 161 | hypothetical protein                    | 88.20  | 100.00 | 6.78E-108 | phage PAK_P1                            | YP_008869165.1 |



|     |       |       |   |     |                                                                   |        |        |           |                                         |                |
|-----|-------|-------|---|-----|-------------------------------------------------------------------|--------|--------|-----------|-----------------------------------------|----------------|
| 92  | 54936 | 55190 | + | 84  | hypothetical protein                                              | 100.00 | 100.00 | 1.68E-57  | phage<br>vB_PaeM_C2-<br>10_Ab1<br>phage | YP_007236908.1 |
| 93  | 55192 | 55581 | + | 129 | hypothetical protein                                              | 98.45  | 100.00 | 7.54E-93  | vB_PaeM_C2-<br>10_Ab1<br>phage          | YP_007236909.1 |
| 94  | 55578 | 56243 | + | 221 | hypothetical protein                                              | 100.00 | 100.00 | 6.13E-164 | phage PAK P1<br>phage                   | YP_004327236.1 |
| 95  | 56230 | 56394 | + | 54  | hypothetical protein                                              | 100.00 | 100.00 | 2.28E-34  | vB_PaeM_C2-<br>10_Ab1<br>phage          | YP_007236911.1 |
| 96  | 56397 | 56699 | + | 100 | hypothetical protein                                              | 100.00 | 100.00 | 1.75E-70  | phage K5                                | YP_009273851.1 |
| 97  | 56700 | 57122 | + | 140 | hypothetical protein                                              | 100.00 | 100.00 | 3.29E-105 | phage PAK P4                            | YP_008859259.1 |
| 98  | 57131 | 57247 | + | 38  | hypothetical protein                                              | 97.37  | 100.00 | 6.96E-22  | phage PAK P4                            | YP_008859260.1 |
| 99  | 57240 | 57368 | + | 42  | hypothetical protein                                              | 100.00 | 100.00 | 6.51E-24  | phage phiMK                             | YP_009291143.1 |
| 100 | 57355 | 57546 | + | 63  | putative RNA<br>methyltransferase                                 | 100.00 | 100.00 | 3.43E-40  | phage phiMK                             | YP_009291142.1 |
| 101 | 57556 | 57801 | + | 81  | putative DNA<br>primase/helicase                                  | 98.77  | 100.00 | 7.04E-57  | phage<br>vB_PaeM_C2-<br>10_Ab1<br>phage | YP_007236915.1 |
| 102 | 57798 | 57983 | + | 61  | hypothetical protein                                              | 100.00 | 100.00 | 1.32E-41  | phage JG004                             | YP_007002431.1 |
| 103 | 58037 | 59899 | + | 620 | hypothetical protein                                              | 100.00 | 100.00 | 0         | phage JG004                             | YP_007003114.1 |
| 104 | 59960 | 62674 | + | 904 | putative DNA polymerase                                           | 99.34  | 100.00 | 0         | phage C11                               | YP_009186992.1 |
| 105 | 62764 | 63162 | + | 132 | hypothetical protein                                              | 100.00 | 100.00 | 4.84E-92  | phage PAK P4<br>phage                   | YP_008859267.1 |
| 106 | 63185 | 63352 | + | 55  | hypothetical protein                                              | 100.00 | 100.00 | 9.67E-35  | vB_PaeM_C2-<br>10_Ab1<br>phage          | YP_007236920.1 |
| 107 | 63354 | 64070 | + | 238 | hypothetical protein                                              | 100.00 | 100.00 | 4.34E-178 | phage JG004                             | YP_007002427.1 |
| 108 | 64172 | 65176 | + | 334 | hypothetical protein                                              | 99.40  | 100.00 | 0         | phage JG004                             | YP_007002426.1 |
| 109 | 65246 | 65479 | + | 77  | hypothetical protein                                              | 100.00 | 100.00 | 4.64E-48  | phage JG004                             | YP_007002425.1 |
| 110 | 65489 | 65710 | + | 73  | hypothetical protein                                              | 100.00 | 100.00 | 6.35E-50  | phage JG004                             | YP_007002424.1 |
| 111 | 65752 | 66804 | + | 350 | putative<br>exodeoxyribonuclease                                  | 99.71  | 100.00 | 0         | phage C11                               | YP_009186999.1 |
| 112 | 66801 | 67364 | + | 187 | hypothetical protein                                              | 100.00 | 100.00 | 2.44E-138 | phage<br>vB_PaeM_MAG1<br>phage          | YP_009287360.1 |
| 113 | 67361 | 67759 | + | 132 | hypothetical protein                                              | 100.00 | 100.00 | 2.25E-96  | phage C11                               | YP_009187001.1 |
| 114 | 67756 | 67992 | + | 78  | hypothetical protein                                              | 100.00 | 100.00 | 9.28E-52  | phage PAK P1                            | YP_008869173.1 |
| 115 | 67989 | 68426 | + | 145 | hypothetical protein                                              | 100.00 | 100.00 | 5.53E-105 | phage C11                               | YP_009187003.1 |
| 116 | 68423 | 68590 | + | 55  | hypothetical protein                                              | 100.00 | 100.00 | 4.1E-35   | phage K5                                | YP_009273872.1 |
| 117 | 68592 | 68774 | + | 60  | hypothetical protein                                              | 100.00 | 100.00 | 2.07E-38  | phage K5                                | YP_009273873.1 |
| 118 | 68771 | 69550 | + | 259 | hypothetical protein                                              | 100.00 | 100.00 | 0         | phage PAK P4<br>phage                   | YP_008859280.1 |
| 119 | 69547 | 69729 | + | 60  | hypothetical protein                                              | 100.00 | 100.00 | 2.58E-38  | vB_PaeM_MAG1<br>phage                   | YP_009287353.1 |
| 120 | 69741 | 69950 | + | 69  | hypothetical protein                                              | 100.00 | 100.00 | 1.91E-44  | vB_PaeM_MAG1<br>phage                   | YP_009287352.1 |
| 121 | 69969 | 70304 | + | 111 | hypothetical protein                                              | 100.00 | 100.00 | 4.7E-77   | vB_PaeM_C2-<br>10_Ab1<br>phage          | YP_007236933.1 |
| 122 | 70308 | 70523 | + | 71  | hypothetical protein                                              | 100.00 | 100.00 | 1.81E-45  | vB_PaeM_MAG1<br>phage                   | YP_009287350.1 |
| 123 | 70516 | 71466 | + | 316 | putative 3'-phosphatase                                           | 98.73  | 100.00 | 0         | phage JG004                             | YP_007002411.1 |
| 124 | 71502 | 71618 | + | 38  | hypothetical protein                                              | 97.37  | 100.00 | 4.49E-21  | phage PAK P4                            | YP_008859286.1 |
| 125 | 71673 | 72620 | + | 315 | Putative thymidylate<br>synthase                                  | 99.68  | 100.00 | 0         | phage JG004                             | YP_007002410.1 |
| 126 | 72623 | 72967 | + | 114 | hypothetical protein                                              | 100.00 | 100.00 | 1.75E-83  | phage PaP1                              | YP_007236522.1 |
| 127 | 72984 | 74030 | + | 348 | putative ribonucleoside-<br>diphosphate reductase beta<br>subunit | 100.00 | 100.00 | 0         | phage JG004                             | YP_007002408.1 |
| 128 | 74023 | 75768 | + | 581 | putative ribonucleoside-<br>diphosphate reductase<br>alpha chain  | 99.83  | 100.00 | 0         | phage C11                               | YP_009187016.1 |
| 129 | 75843 | 75989 | + | 48  | hypothetical protein                                              | 100.00 | 100.00 | 2.28E-30  | phage PAK P4                            | YP_008859291.1 |
| 130 | 75986 | 76213 | + | 75  | hypothetical protein                                              | 100.00 | 100.00 | 4.59E-51  | phage PAK P4                            | YP_008859292.1 |
| 131 | 76213 | 76446 | + | 77  | hypothetical protein                                              | 100.00 | 100.00 | 4.95E-54  | phage JG004<br>phage                    | YP_007002405.1 |
| 132 | 76446 | 76682 | + | 78  | hypothetical protein                                              | 100.00 | 100.00 | 1.16E-52  | vB_PaeM_C2-<br>10_Ab1<br>phage          | YP_007236942.1 |
| 133 | 76682 | 76996 | + | 104 | hypothetical protein                                              | 100.00 | 100.00 | 2.13E-74  | vB_PaeM_C2-<br>10_Ab1<br>phage          | YP_007236943.1 |
| 134 | 76986 | 77171 | + | 61  | hypothetical protein                                              | 100.00 | 100.00 | 2.56E-40  | vB_PaeM_C2-<br>10_Ab1<br>phage          | YP_007236944.1 |
| 135 | 77212 | 77460 | + | 82  | hypothetical protein                                              | 100.00 | 100.00 | 1.52E-55  | phage PAK P2                            | YP_008857125.1 |
| 136 | 77472 | 77957 | + | 161 | hypothetical protein                                              | 100.00 | 100.00 | 2.74E-117 | phage C11<br>phage                      | YP_009187024.1 |
| 137 | 77967 | 78161 | + | 64  | hypothetical protein                                              | 100.00 | 100.00 | 6.9E-42   | vB_PaeM_C2-<br>10_Ab1<br>phage          | YP_007236947.1 |
| 138 | 78163 | 78402 | + | 79  | hypothetical protein                                              | 100.00 | 100.00 | 4.21E-54  | vB_PaeM_C2-<br>10_Ab1<br>phage          | YP_007236948.1 |
| 139 | 78465 | 78665 | + | 66  | hypothetical protein                                              | 100.00 | 100.00 | 3.1E-43   | vB_PaeM_C2-<br>10_Ab1                   | YP_007236949.1 |

|     |       |       |   |     |                      |        |        |           |                       |                |
|-----|-------|-------|---|-----|----------------------|--------|--------|-----------|-----------------------|----------------|
| 140 | 78833 | 79819 | + | 328 | hypothetical protein | 100.00 | 100.00 | 0         | phage C11             | YP_009187028.1 |
| 141 | 80039 | 80212 | + | 57  | hypothetical protein | 100.00 | 100.00 | 1.7E-36   | phage K8              | YP_009200080.1 |
| 142 | 80841 | 81317 | + | 158 | hypothetical protein | 99.37  | 100.00 | 5.36E-117 | phage C11             | YP_009187030.1 |
| 143 | 81392 | 81661 | + | 89  | hypothetical protein | 100.00 | 100.00 | 2.88E-63  | phage C11             | YP_009187031.1 |
| 144 | 81673 | 81816 | + | 47  | hypothetical protein | 100.00 | 100.00 | 5.32E-30  | phage C11             | YP_009187032.1 |
| 145 | 81816 | 82106 | + | 96  | hypothetical protein | 100.00 | 100.00 | 2.86E-66  | phage C11             | YP_009187033.1 |
| 146 | 82096 | 82329 | + | 77  | hypothetical protein | 100.00 | 100.00 | 7.58E-52  | phage C11             | YP_009187034.1 |
| 147 | 82400 | 82528 | + | 42  | hypothetical protein | 100.00 | 100.00 | 8.03E-24  | phage JG004<br>phage  | YP_007002390.1 |
| 148 | 82528 | 82836 | + | 102 | hypothetical protein | 100.00 | 100.00 | 5.02E-72  | vB_PaeM_C2-<br>10 Ab1 | YP_007236957.1 |
| 149 | 82911 | 83057 | + | 48  | hypothetical protein | 100.00 | 100.00 | 6.84E-26  | phage C11             | YP_009187037.1 |
| 150 | 83152 | 83301 | + | 49  | hypothetical protein | 100.00 | 100.00 | 1.31E-31  | phage phiMK           | YP_009291091.1 |
| 151 | 83294 | 83677 | + | 127 | hypothetical protein | 100.00 | 100.00 | 4.44E-91  | phage C11<br>phage    | YP_009187039.1 |
| 152 | 83753 | 84424 | + | 223 | hypothetical protein | 99.10  | 100.00 | 2.2E-168  | vB_PaeM_C2-<br>10 Ab1 | YP_007236959.1 |
| 153 | 84429 | 84767 | + | 112 | hypothetical protein | 100.00 | 100.00 | 9.09E-83  | phage phiMK           | YP_009291088.1 |
| 154 | 84767 | 85120 | + | 117 | hypothetical protein | 100.00 | 100.00 | 9.36E-84  | phage C11             | YP_009187042.1 |
| 155 | 85198 | 85311 | + | 37  | hypothetical protein | 81.08  | 100.00 | 1.09E-16  | phage PAK P4          | YP_008859315.1 |
| 156 | 85384 | 85578 | + | 64  | hypothetical protein | 100.00 | 100.00 | 8.32E-42  | phage C11             | YP_009187043.1 |
| 157 | 85594 | 85890 | + | 98  | hypothetical protein | 100.00 | 100.00 | 6.48E-69  | phage C11             | YP_009187044.1 |
| 158 | 85887 | 86111 | + | 74  | hypothetical protein | 100.00 | 100.00 | 8.36E-51  | phage C11             | YP_009187045.1 |
| 159 | 86144 | 86410 | + | 88  | hypothetical protein | 100.00 | 100.00 | 2.82E-61  | phage C11             | YP_009187046.1 |
| 160 | 86407 | 86799 | + | 130 | hypothetical protein | 100.00 | 100.00 | 9.74E-95  | phage C11             | YP_009187047.1 |
| 161 | 86904 | 87158 | + | 84  | hypothetical protein | 100.00 | 100.00 | 2.64E-57  | phage K5              | YP_009273918.1 |
| 162 | 87236 | 87592 | + | 118 | hypothetical protein | 100.00 | 100.00 | 2.99E-83  | phage K5              | YP_009273919.1 |
| 163 | 87635 | 88216 | + | 193 | hypothetical protein | 99.48  | 100.00 | 1.5E-141  | phage K5              | YP_009273920.1 |
| 164 | 88219 | 88542 | + | 107 | hypothetical protein | 99.07  | 100.00 | 2.8E-75   | phage C11             | YP_009187051.1 |
| 165 | 88578 | 89057 | + | 159 | hypothetical protein | 99.37  | 100.00 | 6.74E-117 | phage C11             | YP_009187052.1 |
| 166 | 89143 | 89670 | + | 175 | hypothetical protein | 100.00 | 100.00 | 1.31E-128 | phage PaP1            | YP_007236558.1 |
| 167 | 89670 | 89951 | + | 93  | hypothetical protein | 100.00 | 100.00 | 3.13E-66  | phage PaP1            | YP_007236559.1 |
| 168 | 89978 | 90142 | + | 54  | hypothetical protein | 98.15  | 100.00 | 1.98E-33  | phage K5              | YP_009273926.1 |
| 169 | 90223 | 90366 | + | 47  | hypothetical protein | 97.87  | 100.00 | 2.87E-28  | phage C11             | YP_009187055.1 |
| 170 | 90430 | 90891 | + | 153 | hypothetical protein | 98.04  | 100.00 | 1.4E-111  | phage phiMK           | YP_009291072.1 |
| 171 | 90908 | 91210 | + | 100 | hypothetical protein | 100.00 | 100.00 | 2.22E-69  | phage phiMK<br>phage  | YP_009291071.1 |
| 172 | 91304 | 91570 | + | 88  | hypothetical protein | 98.86  | 100.00 | 3.92E-61  | vB_PaeM_C2-<br>10 Ab1 | YP_007236977.1 |
| 173 | 91670 | 91864 | + | 64  | hypothetical protein | 98.44  | 100.00 | 5.81E-41  | phage C11             | YP_009187059.1 |
| 174 | 91914 | 92054 | + | 46  | hypothetical protein | -      | -      | -         | -                     | -              |
| 175 | 92059 | 92259 | + | 66  | hypothetical protein | 76.92  | 85.00  | 1.46E-16  | phage PaoP5           | YP_009224863.1 |
| 176 | 92300 | 92461 | + | 53  | hypothetical protein | 98.11  | 100.00 | 7.44E-34  | phage PAK P4          | YP_008859332.1 |
| 177 | 92516 | 92776 | + | 86  | hypothetical protein | 98.84  | 100.00 | 5.47E-56  | phage PAK P4          | YP_008859333.1 |
| 178 | 93301 | 93450 | + | 49  | hypothetical protein | -      | -      | -         | -                     | -              |
| 179 | 93590 | 94192 | + | 200 | hypothetical protein | 99.00  | 100.00 | 0         | phage K5              | YP_009273933.1 |

**Table S4.** Amino acid identity between phage vB\_PaeM\_SCUT-S1 (a) and phage vB\_PaeM\_SCUT-S2 (b) with five most similar members indicated by BLASTN analysis

(a)

| Amino acid identity (100%) | DQ163917.1 (F8) | KP340288.1 (phiKTN6) | KR869157.1 (vB_PaeM_CEB_DP1) | MF490240.1 (vB_PaeM_E 217) | LN610579.1 (vB_PaeM_P AO1_Ab27) |
|----------------------------|-----------------|----------------------|------------------------------|----------------------------|---------------------------------|
| 100                        | 16              | 10                   | 15                           | 16                         | 12                              |
| 95-100                     | 37              | 46                   | 52                           | 50                         | 52                              |
| 90-95                      | 13              | 21                   | 14                           | 14                         | 18                              |
| 80-90                      | 12              | 6                    | 7                            | 2                          | 6                               |
| 70-80                      | 7               | 4                    | 3                            | 5                          | 2                               |
| 60-70                      | 1               | 2                    | 1                            | 1                          | 0                               |
| 50-60                      | 4               | 2                    | 0                            | 1                          | 1                               |
| 30-50                      | 1               | 0                    | 0                            | 2                          | 0                               |
| 0                          | 3               | 3                    | 2                            | 3                          | 3                               |

(b)

| amino acid identity (100%) | GU988610.1 (JG004) | KT804923.1 (C11) | KY073228.1 (Zigelbrucke) | MH370478.1 (SRT6) | MH725810.1 (PaYy-2) |
|----------------------------|--------------------|------------------|--------------------------|-------------------|---------------------|
| 100                        | 44                 | 79               | 46                       | 94                | 107                 |
| 95-100                     | 71                 | 71               | 74                       | 51                | 45                  |
| 90-95                      | 21                 | 14               | 17                       | 10                | 11                  |
| 80-90                      | 11                 | 6                | 17                       | 7                 | 6                   |
| 70-80                      | 7                  | 0                | 3                        | 2                 | 1                   |
| 60-70                      | 4                  | 1                | 4                        | 2                 | 1                   |
| 50-60                      | 5                  | 1                | 3                        | 1                 | 1                   |
| 30-50                      | 5                  | 0                | 6                        | 2                 | 1                   |
| 0                          | 11                 | 7                | 9                        | 10                | 6                   |
